# Supplementary material for: Negative charge and membrane-tethered viral 3B cooperate to recruit viral RNA dependent RNA polymerase 3Dpol
Source: PubMed Central journal article supplement (PMC5725453; doi:10.1038/s41598-017-17621-6), 2017-12-11
Supplement: 41598_2017_17621_MOESM1_ESM.pdf [file 41598_2017_17621_MOESM1_ESM.pdf]

**Negative charge and membrane-tethered viral 3B cooperate to recruit viral RNA dependent RNA polymerase 3D<sup>pol</sup>**

Anna Dubankova<sup>1,‡</sup>, Jana Humpolickova<sup>1,‡</sup>, Martin Klima<sup>1</sup>, Evzen Boura<sup>1,\*</sup>

<sup>1</sup>Institute of Organic Chemistry and Biochemistry AS CR, v.v.i., Flemingovo nam. 2., 166 10 Prague 6, Czech Republic

<sup>‡</sup>these authors contributed equally

\*correspondence to [boura@uochb.cas.cz](mailto:boura@uochb.cas.cz)

## Supplementary Figures

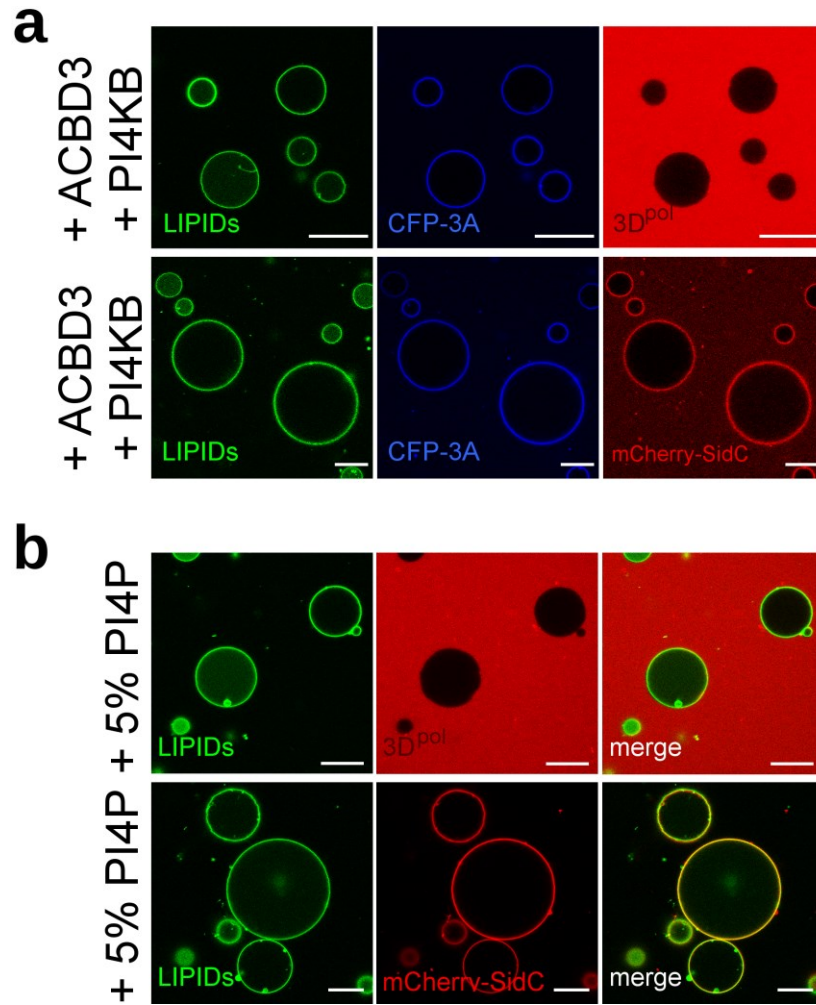

### SI Figure 1 – PI4P mediated recruitment of 3D<sup>pol</sup> under conditions where the nanomolar PI4P binder is recruited

A) **No recruitment observed upon membrane phosphorylation by the 3A:ACBD3:PI4KB protein complex.** Upper panel: GUVs were incubated with 250 nM 3A-CFP and PI4KB, 1  $\mu$ M ACBD3 and 1  $\mu$ M 3D<sup>pol</sup> labeled by rhodamine. Lower panel: the same except that 3D<sup>pol</sup> was replaced with 250 nM mCherry-SidC. GUVs contained 0.1% of PE-Fluorescein lipid (Avanti). Lipids are in green, CFP-3A is in blue, 3D<sup>pol</sup> labeled by rhodamine or mCherry-SidC is in red. Representative image of two independent experiments. Scale bar = 20  $\mu$ m.

B) **No recruitment observed using GUVs containing 5 mol % of synthetic PI4P.** Upper panel: GUVs were incubated with 1  $\mu$ M 3D<sup>pol</sup> labeled by rhodamine. Lower panel: the same except that 3D<sup>pol</sup> was replaced with 250 nM mCherry-SidC. GUVs contained 0.1% of PE-Fluorescein lipid (Avanti). Lipids are in green, CFP-3A is in blue, 3D<sup>pol</sup> labeled by rhodamine or mCherry-SidC is in red. Representative image of two independent experiments. Scale bar = 20  $\mu$ m.

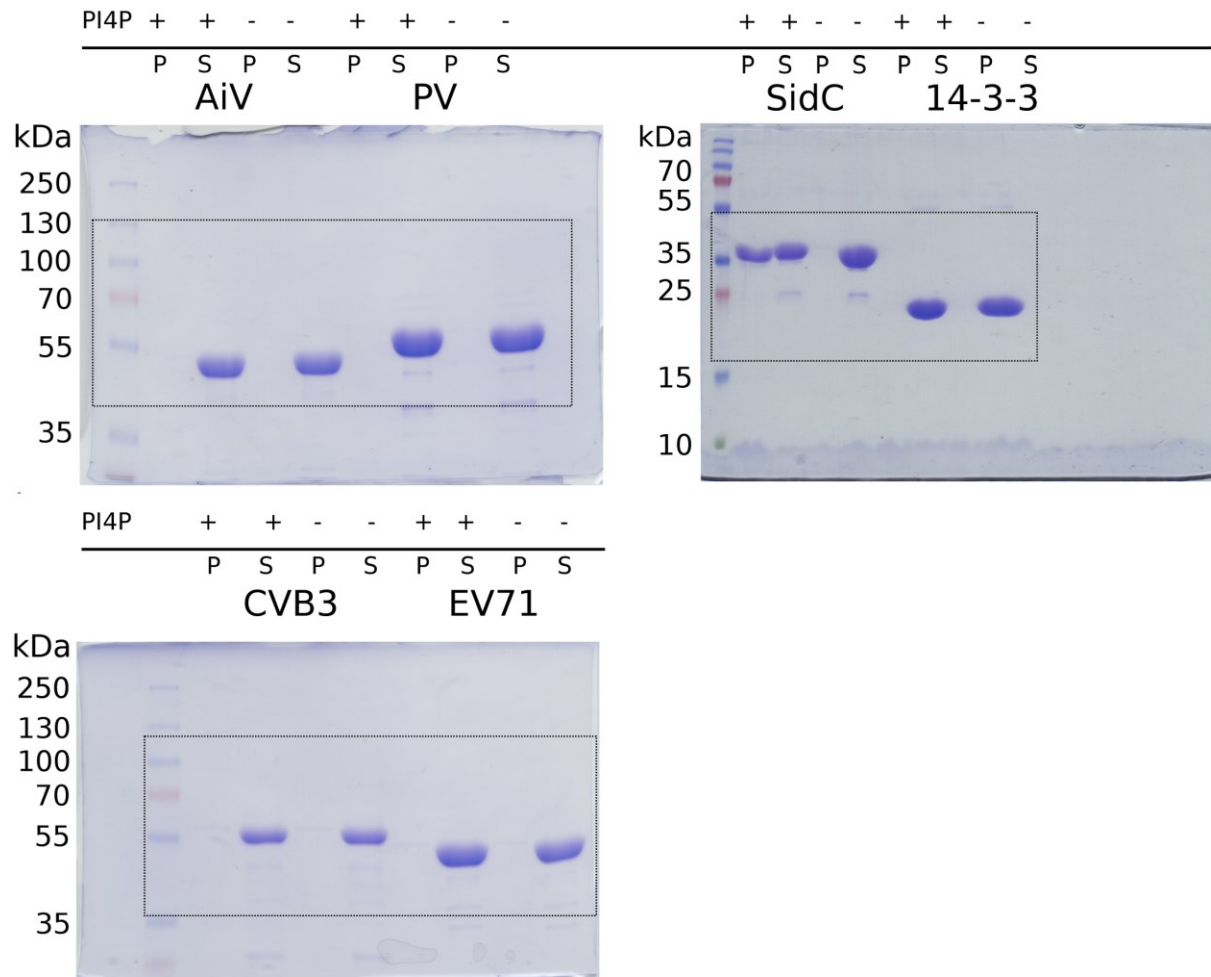

**SI Figure 2 – Full length gels** – Full length gel accompanying Figure 4A – Dashed rectangles are shown in Fig. 4

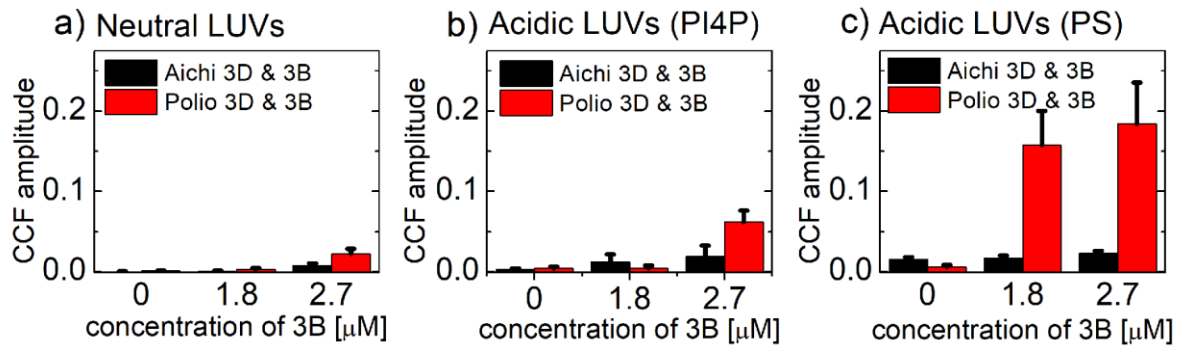

**SI Figure 3 – Amplitudes of the functions that cross-correlate fluorescence signal of CFP-3D<sup>pol</sup> and of LUVs labeled with ATTO647-DOPE.** The amplitudes are shown for various LUV lipid compositions: a) neutral LUVs, b) acidic LUVs (PI4P), and c) acidic LUVs (PS), and for increasing amounts of membrane-tethered 3B. Black and red columns stand for Aichi and PV viral proteins, respectively. The error bar represents the standard error of the mean.

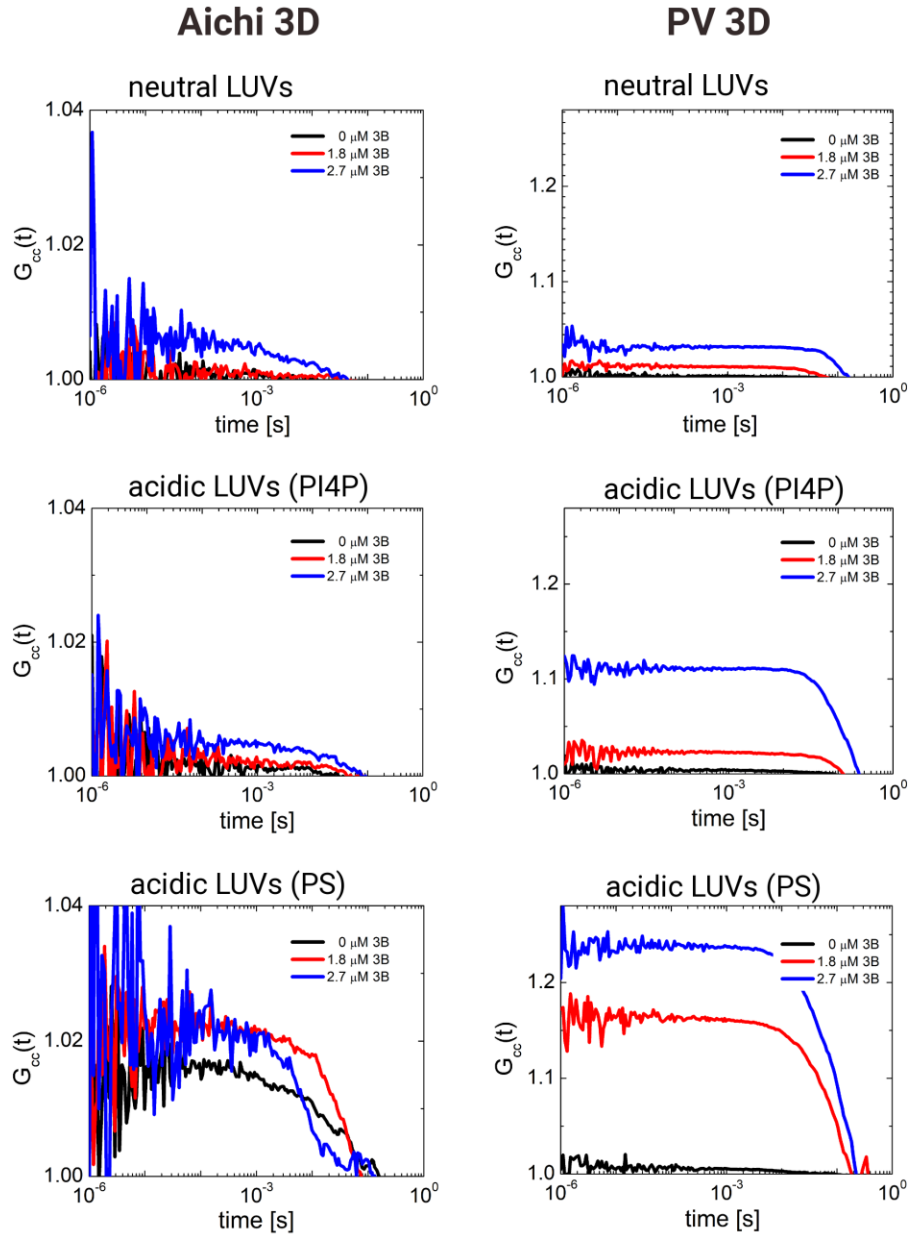

**SI Figure 4 – An independent set of experiments conducted in the same way as in Figure 4D (Cross-correlation curves of CFP – 3D<sup>pol</sup> and LUVs).** FCS curves representing temporal cross-correlation of the CFP-3D<sup>pol</sup> (Aichi 3D<sup>pol</sup> on the left panel and PV 3D<sup>pol</sup> on the right panel) and ATTO647N-DOPE labelled LUVs at various membrane lipid compositions (neutral, enriched by PI4P, and enriched by PS; see SI Table 1). The curves show the cooperative effect of the 3B peptide on 3D<sup>pol</sup> membrane recruitment. The concentration of the Aichi or PV 3B peptide (attached to the membrane surface by His-tag – 18:1 DGS-NTA(Ni) interaction) was 0  $\mu\text{M}$  (black), 1.8  $\mu\text{M}$  (red), and 2.7  $\mu\text{M}$  (blue).

| Figure           | Membrane type | POPC [%] | POPS [%] | PI [%] | PI4P [%] | cholesterol | DGS-NTA(Ni) [%] | Atto647N-DOPE [%] |
|------------------|---------------|----------|----------|--------|----------|-------------|-----------------|-------------------|
| 1                | GUVs          | 54.9     | 10       | 10     | 0        | 20          | 5               | 0.1               |
| 2                | GUVs          | 54.9     | 10       | 10     | 0        | 20          | 5               | 0.1               |
| 3                | GUVs          | 54.9     | 10       | 10     | 0        | 20          | 5               | 0.1               |
| SI 1a            | GUVs          | 54.9     | 10       | 10     | 0        | 20          | 5               | 0.1               |
| SI 1b            | GUVs          | 54.9     | 5        | 10     | 5        | 20          | 5               | 0.1               |
| 4b neutral,4c    | GUVs          | 59.99    | 5        | 10     | 0        | 20          | 5               | 0.01              |
| 4b PI4P, 4c      | GUVs          | 54.99    | 5        | 10     | 5        | 20          | 5               | 0.01              |
| 4b PS, 4c        | GUVs          | 39.99    | 25       | 10     | 0        | 20          | 5               | 0.01              |
| 4a - PI4P        | LUVs          | 60       | 20       | 0      | 0        | 20          | 0               | 0                 |
| 4a + PI4P        | LUVs          | 60       | 10       | 0      | 10       | 20          | 0               | 0                 |
| 4d neutral       | LUVs          | 64.99    | 0        | 10     | 0        | 20          | 5               | 0.01              |
| 4d acidic (PI4P) | LUVs          | 49.99    | 10       | 10     | 5        | 20          | 5               | 0.01              |
| 4d acidic (PS)   | LUVs          | 39.99    | 25       | 10     | 0        | 20          | 5               | 0.01              |

**SI Table 1: Membrane composition for each experiment.**
